# Supplementary material for: Genotypic and Phenotypic Detection of AmpC β-lactamases in Enterobacter spp. Isolated from a Teaching Hospital in Malaysia
Source: PLoS One. 2016 Mar 10;11(3):e0150643. doi: 10.1371/journal.pone.0150643 (PMC4786217; doi:10.1371/journal.pone.0150643)
Supplement: S1 Table — (XLSX) [file pone.0150643.s001.xlsx]

## Sheet: Sheet1
Strain Label	Specimen	Isolate ID	CXM 30	CRO 30	CAZ 30	CTX 30	FEP 30	SXT 25	CN 10	CIP 5	AK 30	MRP 10	TZP 110	FOX 30	Multiplex PCR	CC-DDS test	D69C AmpC detection set	AmpC Induction test
EC 01	Blood	Enterobacter cloacae	R	R	R	R	R	R	S	S	S	S	R	R	EBC	negative	positive	positive
EC 02	Blood	Enterobacter cloacae	R	R	R	R	SDD	R	IN	S	IN	S	S	R	negative	negative	positive	negative
EC 03	Blood	Enterobacter cloacae	R	R	S	R	S	R	R	S	S	S	S	R	EBC	positive	negative	positive
EC 04	Blood	Enterobacter cloacae	S	S	S	S	S	S	S	S	S	S	S	R	EBC	positive	negative [C-B>=5]	negative
EC 05	Blood	Enterobacter asburiae	S	R	S	S	S	S	S	S	S	S	S	R	negative	positive	positive	negative
EC 06	Blood	Enterobacter cloacae	S	S	S	S	S	S	S	S	S	S	S	R	negative	positive	positive	negative
EC 07	Blood	Enterobacter cloacae	R	R	IN	R	R	R	R	S	S	S	S	R	EBC	negative	positive	positive
EC 09	Blood	Enterobacter cloacae	R	R	S	R	SDD	R	S	R	S	S	S	R	negative	positive	positive	negative
EC 10	Blood	Enterobacter cloacae	R	R	S	R	S	R	S	S	S	S	S	R	EBC	positive	negative [C-A>=5]	negative
EC 11	Blood	Enterobacter cloacae	S	S	S	S	S	S	S	S	S	S	S	R	negative	positive	positive	negative
EC 12	Blood	Enterobacter asburiae	IN	S	S	S	S	S	S	S	S	S	S	R	negative	positive	positive	negative
EC 13	Blood	Enterobacter cloacae	S	S	S	S	S	S	S	S	S	S	S	R	EBC	positive	positive	positive
EC14	Blood	Enterobacter asburiae	IN	S	S	S	S	S	S	S	S	S	S	R	EBC	negative	positive	positive
EC 15	Blood	Enterobacter cloacae	S	S	S	S	S	S	S	S	S	S	S	R	EBC	positive	positive	negative
EC 16	Blood	Enterobacter cloacae	S	S	S	S	S	S	S	S	S	S	R	R	negative	negative	positive	positive
EC 17	Blood	Enterobacter aerogenes	S	IN	S	S	S	S	S	S	S	S	S	R	negative	positive	positive	positive
EC 18	Blood	Enterobacter asburiae	S	S	S	S	S	S	S	S	S	S	S	R	EBC	positive	negative	negative
EC 19	Blood	Enterobacter cloacae	S	S	S	IN	S	S	S	S	S	S	S	R	EBC	positive	positive	positive
EC 20	Blood	Enterobacter asburiae	S	S	S	S	S	S	S	S	S	S	S	R	negative	positive	positive	positive
EC 21	Blood	Enterobacter cloacae	S	S	S	S	S	S	S	S	S	S	S	R	negative	positive	positive	positive
EC 22	Blood	Enterobacter cloacae	R	R	IN	R	SDD	R	R	S	S	S	S	R	negative	negative	negative [C-A>=5]	positive
EC 23	Blood	Enterobacter cloacae	R	R	R	R	SDD	R	R	S	R	S	S	R	negative	negative	positive	positive
EC 24	Blood	Enterobacter aerogenes	S	S	S	S	S	S	S	S	S	S	S	R	negative	positive	positive	positive
EC 25	Blood	Enterobacter cloacae	S	S	S	S	S	S	S	S	S	S	S	R	negative	positive	positive	positive
EC 26	Blood	Enterobacter asburiae	S	S	S	S	S	S	S	S	S	S	S	R	negative	positive	positive	positive
EC 27	Blood	Enterobacter asburiae	S	S	S	S	S	S	S	S	S	S	S	R	negative	positive	positive	positive
EC 28	Blood	Enterobacter cloacae	R	R	IN	R	SDD	R	R	S	IN	S	S	R	negative	negative	positive	positive
EC 29	Blood	Enterobacter cloacae	R	R	R	R	SDD	S	S	S	S	S	R	R	negative	positive	positive	negative
EC 31	Blood	Enterobacter cloacae	S	S	S	S	S	S	S	S	S	S	S	S	negative	negative	negative	negative
EC 32	Blood	Enterobacter cloacae	R	R	R	R	R	R	R	R	R	S	IN	R	EBC	negative	positive	positive
EC 33	Blood	Enterobacter cloacae	S	S	S	S	S	S	S	S	S	S	S	R	negative	positive	positive	positive
EC 34	Blood	Enterobacter cloacae	S	S	S	S	S	S	S	S	S	S	S	R	EBC	positive	positive	positive
EC 36	Blood	Enterobacter cloacae	R	R	IN	R	SDD	R	R	S	S	S	S	R	negative	positive	positive	positive
EC 37	Blood	Enterobacter cloacae	R	R	R	R	R	R	R	R	S	S	IN	R	EBC	negative	positive	positive
EC 38	Blood	Enterobacter cloacae	R	R	R	R	R	R	R	R	S	S	S	R	EBC	negative	positive	positive
EC 39	Blood	Enterobacter cloacae	S	S	S	S	S	S	S	S	S	S	S	R	negative	positive	positive	positive
EC 40	Blood	Enterobacter cloacae	R	R	R	R	SDD	S	S	S	S	S	IN	R	negative	positive	positive	negative
EC 41	Blood	Enterobacter aerogenes	S	S	S	S	S	S	S	S	S	S	S	S	negative	negative	negative	negative
EC 42	Blood	Enterobacter cloacae	S	S	S	IN	S	R	S	S	S	S	S	R	EBC	positive	positive	positive
EC 44	Blood	Enterobacter cloacae	S	S	S	S	SDD	S	S	S	S	S	S	R	EBC	positive	positive	positive
EC 45	Blood	Enterobacter cloacae	R	R	R	R	S	R	S	S	S	S	S	R	EBC	positive	positive	positive
EC 46	Blood	Enterobacter aerogenes	S	S	S	S	S	S	S	S	S	IN	S	R	negative	positive	positive	negative
EC 48	Blood	Enterobacter cloacae	S	S	S	S	S	S	S	S	S	S	S	R	EBC	positive	positive	positive
EC 49	Blood	Enterobacter cloacae	S	S	S	S	S	S	S	S	S	S	S	R	EBC	positive	positive	negative
EC 51	Blood	Enterobacter aerogenes	R	R	S	R	S	S	S	S	S	S	S	R	negative	positive	positive	positive
EC 52	Blood	Enterobacter cloacae	S	S	S	S	S	S	S	S	S	S	S	S	negative	negative	negative	negative
EC 53	Blood	Enterobacter cloacae	S	S	S	S	S	S	S	S	S	S	S	R	negative	positive	positive	negative
EC 54	Blood	Enterobacter cloacae	R	R	R	R	S	S	S	S	S	S	R	R	EBC	positive	positive	negative
EC 55	Blood	Enterobacter cloacae	R	R	R	R	S	S	S	S	S	S	R	R	EBC	positive	positive	negative
EC 56	Blood	Enterobacter cloacae	R	R	R	R	S	S	S	S	S	S	R	R	EBC	positive	positive	negative
EC 57	Blood	Enterobacter cloacae	R	R	R	R	S	S	S	S	S	S	IN	R	EBC	positive	positive	negative
EC 58	Blood	Enterobacter aerogenes	S	S	S	S	S	S	S	S	S	S	S	R	negative	positive	positive	negative
EC 59	Blood	Enterobacter cloacae	S	S	S	S	S	S	S	S	S	S	S	R	EBC	positive	positive	negative
EC 60	Blood	Enterobacter cloacae	R	R	IN	R	S	R	S	S	IN	S	S	R	EBC	positive	positive	positive
EC 61	Blood	Enterobacter aerogenes	R	R	R	R	R	S	S	S	S	S	IN	R	negative	positive	positive	positive
EC 62	Blood	Enterobacter cloacae	S	S	S	S	S	S	S	S	S	S	S	R	EBC	positive	negative	negative
EC 63	Blood	Enterobacter aerogenes	S	S	S	S	S	S	S	S	S	S	S	R	negative	positive	positive	positive
EC 64	Blood	Enterobacter cloacae	S	S	S	S	S	S	S	S	S	S	S	S	negative	negative	negative	negative
EC 65	Blood	Enterobacter aerogenes	S	IN	S	IN	S	S	S	S	S	S	S	R	negative	positive	positive	positive
EC 66	Blood	Enterobacter asburiae	S	S	S	S	S	S	S	S	S	S	S	R	negative	positive	positive	negative
EC 67	Blood	Enterobacter cloacae	R	R	R	R	R	R	S	S	S	S	IN	R	negative	negative	positive	positive
EC 68	Blood	Enterobacter cloacae	R	R	R	R	S	S	S	S	S	S	R	R	EBC	positive	positive	negative
EC 69	Blood	Enterobacter cloacae	R	R	R	R	S	IN	S	S	S	S	S	R	EBC	positive	positive	negative
EO 01	Nasopharyngeal secretion (NPS)	Enterobacter aerogenes	S	S	S	S	S	S	S	S	S	IN	S	R	negative	positive	negative	negative
EO 03	Tissue (ankle)	Enterobacter cloacae	S	S	S	S	S	S	S	S	S	S	S	R	negative	positive	positive	positive
EO 05	Bronchoalveolar lavage (BAL)	Enterobacter cloacae	S	S	S	IN	S	R	S	S	S	S	S	R	negative	negative	positive	positive
EO 06	Tracheal aspirate	Enterobacter aerogenes	IN	R	IN	R	S	S	S	S	S	S	S	R	negative	positive	positive	positive
EO 09	Pus swab	Enterobacter aerogenes	R	S	S	IN	S	IN	S	IN	S	S	S	R	negative	positive	positive	negative
EO 10	Tissue (burn)	Enterobacter cloacae	S	S	S	S	S	S	S	S	S	S	S	R	negative	positive	positive	positive
EO 11	Pus	Enterobacter asburiae	S	IN	S	S	S	S	S	S	S	S	S	R	negative	positive	positive	positive
EO 13	Urine	Enterobacter cloacae	S	S	S	S	S	S	S	S	S	S	S	R	negative	positive	positive	negative
EO 14	Laparotomy swab	Enterobacter aerogenes	S	S	S	S	S	S	S	S	S	S	S	R	negative	positive	positive	positive
EO 15	Umbilical swab	Enterobacter cloacae	R	R	IN	R	SDD	R	R	S	S	S	S	R	EBC	negative	positive	negative
EO 17	Urine	Enterobacter cloacae	R	R	IN	R	R	R	R	R	R	S	R	R	negative	positive	positive	negative
EO 18	Pleural fluid	Enterobacter cloacae	R	R	R	R	SDD	S	S	S	S	S	IN	R	negative	positive	positive	negative
EO 19	Swab (right thigh)	Enterobacter cloacae	S	S	S	S	S	S	S	S	S	S	S	R	EBC	positive	positive	negative
EO 20	Cerebrospinal fluid (CSF)	Enterobacter aerogenes	S	S	S	S	S	S	S	S	S	S	S	R	negative	positive	positive	positive
EO 21	Swab	Enterobacter cloacae	S	S	S	S	S	S	S	S	S	S	S	R	EBC	negative	positive	positive
EO 22	Cerebrospinal fluid (CSF)	Enterobacter aerogenes	R	R	R	R	R	R	R	S	S	S	IN	R	negative	positive	positive	negative
EO 25	Wound swab	Enterobacter cloacae	R	R	R	R	R	R	R	S	S	S	R	R	negative	negative	positive	negative
EO 26	Sputum	Enterobacter gergoviae	S	S	S	S	S	S	S	S	S	S	S	S	negative	negative	negative	negative
EO 27	Bronchial left	Enterobacter aerogenes	S	S	S	S	S	S	S	S	S	S	S	R	negative	positive	positive	positive
EO 28	Nasopharyngeal secretion (NPS)	Enterobacter cloacae	R	R	S	R	S	R	S	S	S	S	S	R	EBC	positive	positive	negative
EO 29	Modified bronchoalveolar lavage (MBAL)	Enterobacter asburiae	S	S	S	S	S	R	S	S	S	S	S	R	negative	positive	positive	positive
EO 30	Nasal swab	Enterobacter gergoviae	S	R	R	R	S	R	S	S	S	S	S	R	negative	negative	negative	negative
EO 31	Throat swab	Enterobacter aerogenes	S	S	IN	S	S	S	S	S	S	S	S	R	negative	positive	positive	negative
EO 32	Urine	Enterobacter cloacae	S	R	S	S	S	S	S	S	S	S	R	R	EBC	positive	positive	negative
EO 33	Sputum	Enterobacter aerogenes	S	S	S	S	SDD	S	S	S	S	S	S	R	negative	positive	negative	positive
EO 34	Sputum	Enterobacter cloacae	S	S	S	S	S	S	S	S	S	S	S	R	negative	positive	positive	positive
EO 35	Tissue (right toe)	Enterobacter cloacae	S	S	S	S	S	S	S	S	S	S	S	R	negative	negative	positive	positive
EO 36	Modified bronchoalveolar lavage (MBAL)	Enterobacter aerogenes	R	R	R	R	S	S	S	S	S	S	IN	R	negative	positive	positive	negative
EO 37	Tissue (right forearm)	Enterobacter cloacae	S	S	S	S	S	IN	S	S	S	S	S	R	EBC	positive	positive	positive
EO 38	Cerebrospinal fluid (CSF)	Enterobacter cloacae	S	R	IN	R	SDD	R	R	S	S	S	S	R	EBC	negative	positive	negative
EO 39	Swab (right leg)	Enterobacter cloacae	S	S	S	S	S	S	S	S	S	S	S	R	EBC	positive	positive	positive
EO 41	Urine	Enterobacter asburiae	S	S	S	S	S	S	S	S	S	S	S	R	negative	positive	positive	negative
EO 43	Eye swab	Enterobacter cloacae	R	R	IN	R	SDD	R	R	S	S	S	S	R	EBC	positive	positive	positive
EO 44	Tissue (necrotic lymph node)	Enterobacter cloacae	S	S	S	S	S	S	S	S	S	S	S	R	negative	positive	positive	negative
EO 45	Sputum	Enterobacter aerogenes	S	R	S	R	S	S	S	IN	R	S	S	R	negative	positive	positive	negative
EO 46	Throat swab	Enterobacter aerogenes	R	S	IN	IN	S	S	S	S	S	S	S	R	negative	positive	positive	negative
EO 47	Nasopharyngeal secretion (NPS)	Enterobacter cloacae	R	R	R	R	SDD	R	R	S	S	S	S	R	negative	positive	positive	positive
EO 48	Post chest tube site (swab)	Enterobacter cloacae	R	R	R	R	S	R	S	S	S	S	S	R	EBC	positive	positive	negative
EO 49	Pus swab (skin area)	Enterobacter asburiae	S	S	S	S	S	S	S	S	S	S	S	R	EBC	positive	positive	negative
EO 50	Urine	Enterobacter cloacae	R	S	IN	R	S	S	S	S	S	S	S	R	DHA	positive	positive	positive
EO 51	Nasopharyngeal secretion (NPS)	Enterobacter aerogenes	S	S	S	S	S	S	S	S	S	S	S	R	negative	positive	negative	negative
EO 52	Swab	Enterobacter aerogenes	R	R	R	R	S	S	S	S	S	R	R	R	negative	positive	positive	negative
EO 53	Throat swab	Enterobacter cloacae	S	S	S	R	S	R	S	S	R	S	S	R	negative	positive	negative	positive
EO 55	Percutaneous transhepatic biliary drainage (PTBD) fluid	Enterobacter aerogenes	S	S	S	S	S	S	S	S	S	S	S	R	negative	negative	positive	negative
EO 56	Tissue (right toe)	Enterobacter cloacae	R	S	S	IN	S	S	S	S	S	S	S	IN	negative	positive	positive	positive
EO 57	Peritoneal fluid	Enterobacter cloacae	S	S	S	IN	S	S	S	S	S	S	S	R	negative	negative	positive	negative
EO 58	Tissue (bone open fracture )	Enterobacter cloacae	R	R	R	R	S	S	S	S	S	S	S	R	negative	positive	positive	negative
EO 59	Tissue (femur)	Enterobacter cloacae	S	S	S	IN	S	R	S	S	S	S	S	R	negative	positive	positive	negative
EO 60	Wound swab	Enterobacter aerogenes	S	S	S	S	S	S	S	S	S	S	S	R	negative	positive	positive	negative
EO 61	Sputum	Enterobacter aerogenes	S	S	S	S	S	S	S	S	S	S	S	R	negative	negative	negative	positive
EO 62	Swab (left knee)	Enterobacter cloacae	S	S	S	S	S	S	S	S	S	S	S	S	negative	negative	negative	negative
EO 63	Ventriculo-petrinoeal (VP) shunt tip	Enterobacter cloacae	R	R	R	R	S	S	S	S	S	S	R	R	negative	positive	positive	negative
EO 64	Urine	Enterobacter aerogenes	S	S	S	S	S	S	S	S	S	S	S	R	negative	positive	positive	negative
EO 65	Urine	Enterobacter cloacae	R	R	R	R	SDD	R	R	S	S	S	S	R	negative	positive	positive	positive
The bacteria investigated in this study were isolated either in pure or mixed cultures from the clinical samples.
Abbreviation: CXM 30, Cefuroxime (30 µg); CRO 30, Ceftriaxone (30 µg); CAZ 30, Ceftazidime (30 µg); CTX 30, Cefotaxime (30 µg); FEP 30, Cefepime (30 µg); SXT 25, trimethoprim-sulfamethoxazole (25 µg); CN 10, Gentamicin (10 µg); CIP 5, Ciprofloxacin (5 µg); AK 30, Amikacin (30 µg); MRP 10, Meropenem (10 µg); TZP 110, Piperacillin+Tazobactam (110 µg); FOX 30, Cefoxitin (30µg).
Abbreviation: S, Sensitive; I, Intermediate; SDD (for cefepime*), Susceptible Dose Dependent; R, Resistant.
Summary of sample types: blood (n=63); respiratory specimens (NPS, BAL, tracheal aspirate, sputum, bronchial lavage, MBAL, pleural fluid, nasal swab and throat swab) (n=19); swabs from various sites (n=13); tissues (n=8); urine (n=7) and others (CSF, peritoneal fluid, pus, PTBD and VP shunt tip) (n=7).
